# Supplementary material for: Nuclease-free precise genome editing corrects MECP2 mutations associated with Rett syndrome
Source: PubMed Central journal article supplement (PMC10940404; doi:10.3389/fgeed.2024.1346781), 2024-03-01
Supplement: DataSheet1.pdf [file DataSheet1.pdf]

## Supplementary material

**Table S1.** List of primers used in the study.

| Primer                 | Sequence (5'→3')                                          | Description                                           |
|------------------------|-----------------------------------------------------------|-------------------------------------------------------|
| SCO231                 | atgcatGTCCTACTGCCTCCATGGCC                                | Primers used for cloning of AAVHSC-226 editing vector |
| SCO232                 | gcggccgcatatgCAGGTTGGCTGGCTCCAAC                          |                                                       |
| SCO221                 | GAGGTTTCCCGGAACCTTTTGAAAAC                                |                                                       |
| SCO222                 | CGGTTTTCAAAAGGTTCCGGGAAACCT                               |                                                       |
| AP1<br>MecP2           | ACTAGTGACTACAAAGACCATGACGGTATCGATCGTACCT<br>GAGTTCAAACCTG |                                                       |
| AP2<br>MecP2           | ATCGATACCGTCATGGTCTTTGTAGTCACTAGTGTGCTCA<br>GTCTCTCCAGG   |                                                       |
| qVenus-<br>Fwd         | ctgctgccccgacaacca                                        | Primers used for qPCR to titer vector                 |
| qVenus-<br>Rev         | tgtgatcgcgcttctcggt                                       |                                                       |
| qVenus-<br>probe       | 56-FAM/AGCTACCAGTCCGCCCTGAGCAAAGA/3IABkFQ                 |                                                       |
| Primer<br>1F           | GCTCACAGTAAGGATGCCTAGATG/<br>GGGTACCTGTTGTCAAGATAAGGAAAC  | Primers used for TI assay                             |
| Primer<br>2R           | CCGTCATGGTCTTTGTAGTCACTAG                                 |                                                       |
| Primer<br>2F           | CTAGTGACTACAAAGACCATGACGG                                 |                                                       |
| Primer<br>3R           | AGAAGTGAAAGGATGAAATGAACAAAAG                              |                                                       |
| Primer<br>4F           | CAAAGACCATGACGGTATCGATC                                   |                                                       |
| Primer<br>4R           | GGAACATGAAGACTCAATAGTGC                                   |                                                       |
| Ex3-4-<br>Fwd-<br>qPCR | GTGTATTTGATCAATCCCCAGGG                                   | Primers used for MECP2 qRT-PCR                        |
| Ex4-<br>Rev-<br>qPCR   | GGCTTCTTAGGTGGTTTCTGCTC                                   |                                                       |
| Ex4-<br>probe-<br>qPCR | 56-FAM/CTCCCTCTCCAGTTACCGTGAAGTCAA/3IABkFQ                |                                                       |

Sequences S1-S14 listed below have the following features highlighted:

**Gray highlighted text:** Forward primer (Primer 1F) upstream of 5' homology arm

**Yellow highlighted text:** Reverse primer (Primer 2F/Primer 2R) corresponding to L2

**Blue highlighted text:** Reverse primer (Primer 3R) downstream of 3' homology arm

**Underlined seq:** Marks the junction between the genomic DNA and vector homology arms

**Pink bold font:** L1 sequence inserted in MECP2 Intron 2

**Purple bold font:** L2 sequence inserted in MECP2 Intron 3

**Red bold text:** SNPs between the MECP2 sequence on vector and genome in Intron 2 and Intron 3

**Green bold font:** Codon corresponding to wild type or mutant amino acid

**Sequence S1.** Consensus sequence of Edited Outcome B1 in S134C cells represented in Figure 4B.

GGGTTACCTGTTGTCAAGATAAGGAAACTGAAGCACAGAATGCTGAGGTCATTTGCT  
GGGTTTCATGTTTGGAAAGCGGCAAAGGATTTTCAGTGCAGGTTGGCTGGCTCCAAACC  
TGTGTGTGCTTTCCATGACACTGTACTGTGTGCCTCATTGAGCCTCATTCTAGAAAAC  
CAAAAACACACCCAAGGCCCGGCCTTCACAAAGGAGACCCCTCCCCATTGGCTC  
CCTTTCCAGCAGTCGACGGCCTCTTGTGAGCCATCGAGCCCAGAGTCCCTTGAAGTG  
CGACTCATGCTGGGGTGGTATGCTCAGGAGCCGCAGTGTTCGCTCAGAGGAAAG  
GGCTCTGATTCTCCTGCAGTGCTAGGAGACTTGTGGGTGGCCACAGTGCAGGTCAGG  
CACACCGGCCAGCACCACCCACAGCCCAAATTCCTAAAGAAATATTTGGGTCCCAG  
CTTGGCCCAGTCTCTGTTGTCTGGGGAAGGACATCAAGATCTGAGTGTATGATGG  
CCTGGGGCCTTGCATGTGGTGGGGGTCCAAGCCTGCCTCTGCTCACTTGTCTGCAG  
ACTGGCATGTTCTCTGTGATACTTACATACTTGTTTAACTTCAGGGAAGAAAAGT  
CAGAAGACCAGGACCTCCAGGGCCTCAAGGACAAACCCCTCAAGTTTAAAAAGGTG  
AAGAAAGATAAGAAAGAAGAGAAAGAGGGCAAGCATGAGCCCGTGCAGCCATCAG  
CCCACCACTCTGCTGAGCCCGCAGAGGCAGGCAAAGCAGAGACATCAGAAGGGTCA  
GGCTCCGCCCCGGCTGTGCCGGAAGCTTCTGCCTCCCCCAAACAGCGGCGCTCCATC  
ATCCGTGACCGGGGACCCATGTATGATGACCCACCCCTGCCTGAAGGCTGGACACG  
GAAGCTTAAGCAAAGGAAATCTGGCCGCTCTGCTGGGAAGTATGATGTGTATTTGAT  
CAAGTAAGTAAGAGCAACTCCTATCTCTACAGGGCAGGGAGGGCAGGGACAAGGAT  
CCCTCATGGAGCAGGAAAATGTATGTGCCAGGGTGGGGTTCGGGGGAACATAAAC  
AATGAACACTGAGACCAGGTGTGCTTCAAATGACCGTGTACAGAGGTTCGCTGCCCT  
GAGTGGGAAGTTCTCAAGGTAGCAGGCCCTCTATCCTCTCCACACCTCAAGTCTTTA  
TCTGGGGATGGAATAGCTGCGGAAGCAGAGGAACTTGCAGAGCCAGGGGTTTCAGAG  
GGGTGAAGAAGCATGTTTCAGTTCTGCCTTTTAAATGATCCCAAAAAGGTTAGCAGT  
TTTCAAATGACATTTGCAGACAGCCTCATTTAATTCCATGAGAAGGGTGAAGCAAAGG  
ATTATCTTGTTGAAACTGATTCCTGGAGAGACTGAGCACACTAGTGACTACAAAGAC  
CCATGACGG

**Sequence S2.** Consensus sequence of Edited Outcome B2 in S134C cells represented in Figure 4B.

GGGTTACCTGTTGTCAAGATAAGGAAACTGAAGCACAGAATGCTGAGGTCATTTGCT  
GGGTTTCATGTTTGGAAAGCGGCAAAGGATTTTCAGTGCAGGTTGGCTGGCTCCAAACC  
TGTGTGTGCTTTCCATGACACTGTACTGTGTGCCTCATTGAGCCTCATTCTAGAAAAC  
CAAAAACACACCCAAGGCCCGCCTTCACAAAGGAGACCCCTCCCCATTTGGCTC  
CCTTTCCAGCAGTCGACGGCCTCTTGTACGCCATCGAGCCCAGAGTCCCTTGAAGTG  
CGACTCATGCTGGGGTGGTATGCTCAGGAGCCGCAGTGTTCCGCTCAGAGGAAAG  
GGCTCTGATTCTCCTGCAGTGCTAGGAGACTTGTGGGTGGCCACAGTGCAGGTCAGG  
CACACCGGCCAGCACCACCCACAGCCCAAATTCCTAAAGAAATATTTGGGTCCAG  
CTTGGCCCGAGTCTCTGTTGTCTGGGAGGTTTCCCGGAACCTTTTGGAAAACCG  
GAAGGACATCAAGATCTGAGTGTATGATGGCCTGGGGCCTTGCATGTGGTGGGGGT  
CCAAGCCTGCCTCTGCTCACTTGTCTGCAGACTGGCATGTTCTCTGTGATACTTACA  
TACTTGTTTAACACTTCAGGGAAGAAAAGTCAGAAGACCAGGACCTCCAGGGCCTC  
AAGGACAAACCCCTCAAGTTTAAAAAGGTGAAGAAAGATAAGAAAGAAGAGAAAG  
AGGGCAAGCATGAGCCCGTGCAGCCATCAGCCCACCACTCTGCTGAGCCCGCAGAG  
GCAGGCAAAGCAGAGACATCAGAAGGGTCAGGCTCCGCCCCGGCTGTGCCGGAAGC  
TTCTGCCTCCCCAACAGCGGCGCTCCATCATCCGTGACCGGGGACCCATGTATGA  
TGACCCACCCCTGCCTGAAGGCTGGACACGGAAGCTTAAGCAAAGGAAATCTGGCC  
GCTCTGCTGGGAAGTATGATGTGTATTTGATCAAGTAAGTAAGAGCAACTCCTATCT  
CTACAGGGCAGGGAGGGCAGGGACAAGGATCCCTCATGGAGCAGGAAAATGTATGT  
GCCCAGGGTGGGGTCCGGGGGAACATAACAATGAACACTGAGACCAGGTGTGCTT  
GAAATGACCGTGTACAGAGGTGCTGCCCTGAGTGGGAAGTTCTCAAGGTAGCAGG  
CCCTCTATCCTCTCCACACCTCAAGTCTTTATCTGGGGATGGAATAGCTGCGGAAGC  
AGAGGAACTTGCAGAGCCAGGGGTTTCAGAGGGGTGAAGAAGCATGTTTCAGTTCTG  
CCTTTTAAATGATCCCAAAAAGGTTAGCAGTTTTCAAATGACATTTGCAGACAGCCT  
CATTTAATTCATGAGAAGGGTGAGCAAAGGATTATCTTGTTGAAACTGATTCCTGG  
AGAGACTGAGCACA**CTAGTGACTACAAAGACCATGACCG**

**Sequence S3.** Consensus sequence of Edited Outcome C1 in S134C cells represented in Figure 4C.

**CAAAGACCATGACGGTATCGATC**GTACCTGAGTTCAAACCTTGGGAATGTTCTAGAT  
GGTGACTCAGGCCCAGGCACCAACCAGCAGAATGGGCCTCAGCCTGACAACCCTTC  
TGTACCAGGCCTGACTCTTTGGTTGCTGAACTTTGGAGAGGCCTGGGGGGGTCAGCG  
GCAGGCAGACGAGTGAGTGGCTTTGGTGACAGGTCTCAGGGGCAGCCAGGCAGTG  
TGACTCTCGTTCAATAGTAACGTTTGTGACAGCGTTGTCACCACCATCCGCTCTGCC  
TATCTCTGACATTGCTATGGAGAGCCTCTAATTGTTCCCTGTGTCTTTCTGTTTGTCCC  
CACAGTCCCCAGGGAAAAGCCTTTCGCTCTAAAGTGGAGTTGATTGCGTACTTCGAA  
AAGGTAGGCGACACATCCCTGGACCCTAATGATTTTACTTCACGGTAACTGGGAGA  
GGGAGCCCCCTCCCGGCGAGAGCAGAAACCACCTAAGAAGCCCAAATCTCCCAAAGC  
TCCAGGAACTGGCAGAGGCCGGGGACGCCCCAAAGGGAGCGGCACCACGAGACCC  
AAGGCGGCCACGTCAGAGGGTGTGCAGGTGAAAAGGGTCTGGAGAAAAGTCTCTGG

GAAGCTCCTTGTCAAGATGCCTTTTCAAACCTTCGCCAGGGGGCAAGGCTGAGGGGG  
GTGGGGCCACCACATCCACCCAGGTCATGGTGATCAAACGCCCCCGGCAGGAAGCGA  
AAAGCTGAGGCCGACCCTCAGGCCATTCCCAAGAAACGGGGCCGAAAGCCGGGGA  
GTGTGGTGGCAGCCGCTGCCGCCGAGGCCAAAAAGAAAGCCGTGAAGGAGTCTTCT  
ATCCGATCTGTGCAGGAGACCGTACTCCCATCAAGAAGCGCAAGACCCGGGAGAC  
GGTCAGCATCGAGGTCAAGGAAGTGGTGAAGCCCCTGCTGGTGTCCACCCTCGGTG  
AGAAGAGCGGGAAAGGACTGAAGACCTGTAAGAGCCCTGGGCGGAAAAGCAAGGA  
GAGCAGCCCCAAGGGGCGCAGCAGCAGCGCCTCCTCACCCCCAAGAAGGAGCACC  
ACCACCATCACCACCCTCAGAGTCCCCAAAGGCCCCCGTGCCACTGCTCCCACCCC  
TGCCCCACCTCCACCTGAGCCCGAGAGCTCCGAGGACCCACCAGCCCCCCTGAGC  
CCCAGGACTTGAGCAGCAGCGTCTGCAAAGAGGAGAAGATGCCCAGAGGAGGCTC  
ACTGGAGAGCGACGGCTGCCCAAGGAGCCAGCTAAGACTCAGCCC GCGGTTGCCA  
CCGCCGCCACGGCCGAGAAAAGTACAAACACCGAGGGGAGGGAGAGCGCAAAGA  
CATTGTTTCATCCTCCATGCCAAGGCCAAACAGAGAGGAGCCTGTGGACAGCCGGA  
CGCCCGTGACCGAGAGAGTTAGCTGACTTTACACGGAGCGGATTGCAAAGCAAACC  
AACAGAATAAAGGCAGCTGTTGTCTCTTCTCCTTATGGGTAGGGCTCTGACAAAGC  
TTCCCGATTAAGTAAATAAAAAATATTTTTTTTTCTTTCAGTAAACTTAGAGTTTCG  
TGGCTTCAGGGTGGGAGTAGTTGGAGCATTGGGGATGTTTTTCTTACCGACAAGCAC  
AGTCAGGTTGAAGACCTAACCAGGGCCAGAAGTAGCTTTGCACTTTTCTAAACTAGG  
CTCCTTCAACAAGGCTTGCTGCAGATACTACTGACCAGACAAGCTGTTGACCAGGCA  
CCTCCCCTCCCGCCAAACCTTTCCCCCATGTGGTTCGTTAGAGACAGAGCGACAGAG  
CAGTTGAGAGGACACTCCCGTTTTTCGGTGCCATCAGTGCCCCGTCTACAGCTCCCC  
AGCTCCCCCACCTCCCCACTCCCAACCACGTTGGGACAGGGAGGTGTGAGGCAG  
GAGAGACAGTTGGATTCTTTAGAGAAGATGGATATGACCAGTGGCTATGGCCTGTG  
CGATCCCACCCGTGGTGGCTCAAGTCTGGCCCCACACCAGCCCCAATCCAAAACCTGG  
CAAGGACGTTTACAGGACAGGAAAGTGGCACCTGTCTGCTCCAGCTCTGGCATGG  
CTAGGAGGGGGGAGTCCCTTGAACACTACTGGGTGTAGACTGGCCTGAACCACAGGAG  
AGGATGGCCAGGGTGGAGTGGCATGGTCCATTCTCAAGGGACGTCTCCAACGGG  
TGCGCTAGAGGCCATGGAGGCAGTAGGACAAGGTGCAGGCAGGCTGGCCTGGGGT  
CAGGCCGGGCAGAGCACAGCGGGGTGAGAGGGATTCTAATCACTCAGAGCAGTCT  
GTGACTTAGTGACAGGGGAGGGGGCAAAGGGGGAGGAGAAGAAAATGTTCTTCC  
AGTTACTTTCCAATTCTCCTTTAGGGACAGCTTAGAATTATTTGCACTATTGAGTCTT  
CATGTTCCC

**Sequence S4.** Consensus sequence of Edited Outcome C2 in S134C cells represented in Figure 4C.

CAAAGACCATGACGGTATCGATCGTACCTGAGTTCAAACCTGGGAATGTTCTAGAT  
GGTGACTCAGGCCCAGGCACCAACCAGCAGAATGGGCCTCAGCCTGACAACCCTTC  
TGTACCAGGCCTGACTCTTTGGTTGCTGAACTTTGGAGAGGCCTGGGGGGGTCAGCG  
GCAGGCAGACGAGTGAGTGGCTTTGGTGACAGGTCCCTCAGGGGCAGCCAGGCAGTG  
TGACTCTCGTTCAATAGTAACGTTTGTGACAGCGTTGTCACCACCATCCGCTCTGCC  
TATCTCTGACATTGCTATGGAGAGCCTCTAATTGTTCTTGTGTCTTTCTGTTTGTCCC  
CACAGTCCCCAGGGAAAAGCCTTTCGCTGTAAAGTGGAGTTGATTGCGTACTTCGA

AAAGGTAGGCGACACATCCCTGGACCCTAATGATTTTGACTTCACGGTAACTGGGAG  
AGGGAGCCCCTCCCGGCGAGAGCAGAAACCACCTAAGAAGCCCAAATCTCCCAAAG  
CTCCAGGA<sup>ACTGGCAGAGGCCGGGGACGCCCCAAAGGGAGCGGCACCACGAGACC</sup>  
CAAGGCGGCCACGTCAGAGGGTGTGCAGGTGAAAAGGGTCCTGGAGAAAAGTCCTG  
GGAAGCTCCTTGTCAAGATGCCTTTTCAA<sup>ACTTCGCCAGGGGGCAAGGCTGAGGGG</sup>  
GGTGGGGCCACCACATCCACCCAGGTCATGGTGTATCAAACGCCCCCGCAGGAAGCG  
AAAAGCTGAGGCCGACCCTCAGGCCATTCCCAAGAAACGGGGCCGAAAGCCGGGG  
AGTGTGGTGGCAGCCGCTGCCGCCGAGGCCAAAAGAAAGCCGTGAAGGAGTCTTC  
TATCCGATCTGTGCAGGAGACCGTACTCCCCATCAAGAAGCGCAAGACCCGGGAGA  
CGGTCAGCATCGAGGTCAAGGAAGTGGTGAAGCCCCTGCTGGTGTCCACCCTCGGT  
GAGAAGAGCGGGAAAGGACTGAAGACCTGTAAGAGCCCTGGGCGGAAAAGCAAGG  
AGAGCAGCCCCAAGGGGCGCAGCAGCAGCGCCTCCTCACCCCCAAGAAGGAGCAC  
CACCACCATCACCACCACTCAGAGTCCCCAAAGGCCCCCGTGCCACTGCTCCCACCC  
CTGCCCCCACCTCCACCTGAGCCCAGAGCTCCGAGGACCCCCACCAGCCCCCTGAG  
CCCCAGGACTTGAGCAGCAGCGTCTGCAAAGAGGAGAAGATGCCCAGAGGAGGCTC  
ACTGGAGAGCGACGGCTGCCCAAGGAGCCAGCTAAGACTCAGCCCGCGGTTGCCA  
CCGCCGCCACGGCCGAGAAAAGTACAAACACCGAGGGGAGGGAGAGCGCAAAGA  
CATTGTTTCATCCTCCATGCCAAGGCCAAACAGAGAGGAGCCTGTGGACAGCCGGA  
CGCCCGTGACCGAGAGAGTTAGCTGACTTTACACGGAGCGGATTGCAAAGCAAACC  
AACAGAATAAAGGCAGCTGTTGTCTCTTCTCCTTATGGGTAGGGCTCTGACAAAGC  
TTCCCGATTA<sup>ACTGAAATAAAAAATATTTTTTTTTTTCTTTCAGTAAACTTAGAGTTTCG</sup>  
TGGCTTCAGGGTGGGAGTAGTTGGAGCATTGGGGATGTTTTTTCTTACCGACAAGCAC  
AGTCAGGTTGAAGACCTAACCAGGGCCAGAAGTAGCTTTGCACTTTTCTAAACTAGG  
CTCCTTCAACAAGGCTTGCTGCAGATACTACTGACCAGACAAGCTGTTGACCAGGCA  
CCTCCCCTCCCGCCCAAACCTTTCCCCCATGTGGTTCGTTAGAGACAGAGCGACAGAG  
CAGTTGAGAGGACACTCCCGTTTTTCGGTGCCATCAGTGCCCCGTCTACAGCTCCCC  
AGCTCCCCCACCTCCCCACTCCCAACCACGTTGGGACAGGGAGGTGTGAGGCAG  
GAGAGACAGTTGGATTCTTTAGAGAAGATGGATATGACCAGTGGCTATGGCCTGTG  
CGATCCCACCCGTGGTGGCTCAAGTCTGGCCCCACACCAGCCCCAATCCAAA<sup>ACTGG</sup>  
CAAGGACGCTTCACAGGACAGGAAAGTGGCACCTGTCTGCTCCAGCTCTGGCATGG  
CTAGGAGGGGGGAGTCCCTTGA<sup>ACTACTGGGTGTAGACTGGCCTGAACCACAGGAG</sup>  
AGGATGGCCAGGGTGAAGTGGCATGGTCCATTCTCAAGGGACGTCTCCAACGGG  
TGCGCTAGAGGCCATGGAGGCAGTAGGACAAGGTGCAGGCAGGCTGGCCTGGGGT  
CAGGCCGGGCAGAGCACAGCGGGGTGAGAGGGATTCCTAATCACTCAGAGCAGTCT  
GTGACTTAGTGGACAGGGGAGGGGGCAAAGGGGGAGGAGAAGAAAATGTTCTTCC  
AGTTACTTTCCAATTCTCCTTTAGGGACAGCTTAGAATTATTTGCACTATTGAGTCTT  
CATGTTCCC

**Sequence S5.** Consensus sequence of Edited Outcome 1 in R106W cells represented in Figure 5.

GCTCACAGTAAGGATGCCTAGATGGGGTTACCTGTTGTCAAGATAAGGAAACTGAA  
GCACAGAATGCTGAGGTCATTTGCTGGGTTTCATGTTTGGAAAGCGGCAAAGGATTTC  
AGTGCAGGTTGGCTGGCTCCAAACCTGTGTGTGCTTTCCATGACACTGTACTGTGTG  
CCTCATTGAGCCTCATTCTAGAAAACCAAAAACACACCCAAGGCCCGCCTTACA

AAGGAGACCCCTCCCCATTTGGCTCCCTTTCCAGCAGTCGACGGCCTCTTGTCAGC  
CATCGAGCCAGAGTCCCTTGAAGTGCGACTCATGCTGGGGTGGTATGCTCAGGAGC  
CGCAGTGTTCGCTCAGAGGAAAGGGCTCTGATTCTCCTGCAGTGCTAGGAGACTT  
GTGGGTGGCCACAGTGCAGGTCAGGCACACCCGGCCAGCACCACCCACAGCCAAAT  
TCCTAAAGAAATATTTGGGTCCCAGCTTGGCCCGAGTCTCTGTTGTCCTGGGGAAGG  
ACATCAAGATCTGAGTGTATGATGGCCTGGGGCCTTGCATGTGGTGGGGGTCCAAGC  
CTGCCTCTGCTCACTTGTCTGCAGACTGGCATGTTCTCTGTGATACTTACATACTTG  
TTAACACTTCAGGGAAGAAAAGTCAAGAACAGGACCTCCAGGGCCTCAAGGAC  
AAACCCCTCAAGTTTAAAAAGGTGAAGAAAGATAAGAAAGAAGAGAAAGAGGGCA  
AGCATGAGCCCGTGCAGCCATCAGCCCACCACTCTGCTGAGCCCGCAGAGGCAGGC  
AAAGCAGAGACATCAGAAGGGTCAGGCTCCGCCCCGGCTGTGCCGGAAGCTTCTGC  
CTCCCCAAACAGCGGCGCTCCATCATCCGTGACCGGGGACCCATGTATGATGACCC  
CACCTGCCTGAAGGCTGGACA CGGAAGCTTAAGCAAAGGAAATCTGGCCGCTCTG  
CTGGGAAGTATGATGTGTATTTGATCAAGTAAGTAAGAGCAACTCCTATCTCTACAG  
GGCAGGGAGGGCAGGGACAAGGATCCCTCATGGAGCAGGAAAATGTATGTGCCA  
GGGTGGGGTTCGGGGGAACATAAACAATGAACACTGAGACCAGGTGTGCTTGAAT  
GACCGTGTACAGAGGTCGCTGCCCTGAGTGGGAAGTTCTCAAGGTAGCAGGCCCTCT  
ATCCTCTCCACACCTCAAGTCTTTATCTGGGGATGGAATAGCTGCGGAAGCAGAGGA  
ACTTGCAGAGC CAGGGGTTCAAGAGGGTGAAGAAGCATGTTTCAGTTCTGCCTTTTA  
AATGATCCCAAAAAGGTTAGCAGTTTTCAAATGACATTTGCAGACAGCCTCATTTAA  
TTCCATGAGAAGGGTGAGCAAAGGATTATCTTGTGAAACTGATTCCTGGAGAGACT  
GAGCACACTAGTGACTACAAAGACCATGACGG

**Sequence S6.** Consensus sequence of Edited Outcome 2 in R106W cells represented in Figure 5.

GGGTTACCTGTTGTCAAGATAAGGAAACTGAAGCACAGAATGCTGAGGTCATTTGCT  
GGGTTTCATGTTTGGAAAGCGGCAAAGGATTTCAAGTGCAGGTTGGCTGGCTCCAAACC  
TGTGTGTGCTTTCATGACACTGTACTGTGTGCCTCATTGAGCCTCATTCTAGAAAAC  
CAAAAACACACCCCAAGGCCCGGCTTCACAAAGGAGACCCCTCCCCATTTGGCTC  
CCTTTCCAGCAGTCGACGGCCTCTTGTGAGCCATCGAGCCCAGAGTCCCTTGAAGTG  
CGACTCATGCTGGGGTGGTATGCTCAGGAGCCGCAGTGTTTCCGCTCAGAGGAAAG  
GGCTCTGATTCTCCTGCAGTGCTAGGAGACTTGTGGGTGGCCACAGTGCAGGTCAGG  
CACACCGGCCAGCACCACCCACAGCCAAATTCCTAAAGAAATATTTGGGTCCCAG  
CTTGGCCCGAGTCTCTGTTGTCCTGGGGAAGGACATCAAGATCTGAGTGTATGATGG  
CCTGGGGCCTTGCATGTGGTGGGGGTCCAAGCCTGCCTCTGCTCACTTGTCTGCAG  
ACTGGCATGTTCTCTGTGATACTTACATACTTGTTTAACACTTCAGGGAAGAAAAGT  
CAGAAGACCAGGACCTCCAGGGCCTCAAGGACAAACCCCTCAAGTTTAAAAAGGTG  
AAGAAAGATAAGAAAGAAGAGAAAGAGGGCAAGCATGAGCCCGTGCAGCCATCAG  
CCCACCACTCTGCTGAGCCCGCAGAGGCAGGCAAAGCAGAGACATCAGAAGGGTCA  
GGCTCCGCCCCGGCTGTGCCGGAAGCTTCTGCCTCCCCAAACAGCGGCGCTCCATC  
ATCCGTGACCGGGGACCCATGTATGATGACCCACCCCTGCCTGAAGGCTGGACATG  
GAAGCTTAAGCAAAGGAAATCTGGCCGCTCTGCTGGGAAGTATGATGTGTATTTGAT  
CAAGTAAGTAAGAGCAACTCCTATCTCTACAGGGCAGGGAGGGCAGGGACAAGGAT  
CCCTCATGGAGCAGGAAAATGTATGTGCCAGGGTGGGGTTCGGGGGAACATAAAC

AATGAACACTGAGACCAGGTGTGCTTCAAATGACCGTGTACAGAGGTCGCTGCCCT  
GAGTGGGAAGTTCTCAAGGTAGCAGGCCCTCTATCCTCTCCACACCTCAAGTCTTTA  
TCTGGGGATGGAATAGCTGCGGAAGCAGAGGAACTTGCAGAGCCAGGGGTTTCAGAG  
GGGTGAAGAAGCATGTTTCAGTTCTGCCTTTTAAATGATCCCAAAAAGGTTAGCAGT  
TTTCAAATGACATTTGCAGACAGCCTCATTTAATTCCATGAGAAGGGTGTAGCAAAGG  
ATTATCTTGTTGAAACTGATTCCTGGAGAGACTGAGCACACTAGTGACTACAAAGA  
CCATGACGG

**Sequence S7.** Consensus sequence of Edited Outcome 3 in R106W cells represented in Figure 5.

GCTCACAGTAAGGATGCCTAGATGGGGTTACCTGTTGTCAAGATAAGGAACTGAA  
GCACAGAATGCTGAGGTCATTTGCTGGGTTTCATGTTTGGAAAGCGGCAAAGGATTTC  
AGTGCAGGTTGGCTGGCTCCAAACCTGTGTGTGCTTTCCATGACACTGTACTGTGTG  
CCTCATTGAGCCTCATTCTAGAAAACCAAAAACACACCCAAGGCCCGGCCTTACACA  
AAGGAGACCCCTCCCCATTTGGCTCCCTTTCCAGCAGTCGACGGCCTCTTGTTCAGC  
CATCGAGCCCAGAGTCCCTTGAAGTGCGACTCATGCTGGGGTGGTATGCTCAGGAGC  
CGCAGTGTTCGCTCAGAGGAAAGGGCTCTGATTCTCCTGCAGTGCTAGGAGACTT  
GTGGGTGGCCACAGTGCAGGTCAGGCACACCGGCCAGCACCCACACAGCCCAAAT  
TCCTAAAGAAATATTTGGGTCCAGCTTGGCCCGAGTCTCTGTTGTCTGGGAGGTT  
TCCCGGAACCTTTTGGAAAACCGGAAGGACATCAAGATCTGAGTGTATGATGGCC  
TGGGGCCTTGCATGTGGTGGGGGTCCAAGCCTGCCTCTGCTCACTTGTCTGCAGAC  
TGGCATGTTCTCTGTGATACTTACATACTTGTTTAACACTTCAGGGAAGAAAAGTCA  
GAAGACCAGGACCTCCAGGGCCTCAAGGACAAACCCCTCAAGTTTAAAAAGGTGAA  
GAAAGATAAGAAAGAAGAGAAAGAGGGCAAGCATGAGCCCGTGCAGCCATCAGCC  
CACCCTCTGCTGAGCCCGCAGAGGCAGGCAAAGCAGAGACATCAGAAGGGTCAG  
GCTCCGCCCCGGCTGTGCCGAAGCTTCTGCCTCCCCCAAACAGCGGCGCTCCATCA  
TCCGTGACCGGGGACCCATGTATGATGACCCACCCTGCCTGAAGGCTGGACACCGG  
AAGCTTAAGCAAAGGAAATCTGGCCGCTCTGCTGGGAAGTATGATGTGTATTTGATC  
AAGTAAGTAAGAGCAACTCCTATCTCTACAGGGCAGGGAGGGCAGGGACAAGGATC  
CCTCATGGAGCAGGAAAATGTATGTGCCAGGGTGGGGTTCGGGGGGAACATAAACA  
ATGAACACTGAGACCAGGTGTGCTTCAAATGACCGTGTACAGAGGTCGCTGCCCTG  
AGTGGGAAGTTCTCAAGGTAGCAGGCCCTCTATCCTCTCCACACCTCAAGTCTTTAT  
CTGGGGATGGAATAGCTGCGGAAGCAGAGGAACTTGCAGAGCCAGGGGTTTCAGAG  
GGGTGAAGAAGCATGTTTCAGTTCTGCCTTTTAAATGATCCCAAAAAGGTTAGCAGT  
TTTCAAATGACATTTGCAGACAGCCTCATTTAATTCCATGAGAAGGGTGTAGCAAAGG  
ATTATCTTGTTGAAACTGATTCCTGGAGAGACTGAGCACACTAGTGACTACAAAGA  
CCATGACGG

**Sequence S8.** Consensus sequence of Edited Outcome 4 in R106W cells represented in Figure 5.

GGGTTACCTGTTGTCAAGATAAGGAACTGAAGCACAGAATGCTGAGGTCATTTGCT  
GGGTTTCATGTTTGGAAAGCGGCAAAGGATTTCAGTGCAGGTTGGCTGGCTCCAAACC  
TGTGTGTGCTTTCCATGACACTGTACTGTGTGCCTCATTGAGCCTCATTCTAGAAAAC  
CAAAAACACACCCAAGGCCCGGCCTTCAAAAGGAGACCCCTCCCCATTTGGCTC  
CCTTTCCAGCAGTCGACGGCCTCTTGTTCAGCCATCGAGCCCAGAGTCCCTTGAAGTG

CGACTCATGCTGGGGTGGTATGCTCAGGAGCCGCAGTGTTTCCGCTCAGAGGAAAG  
GGCTCTGATTCTCCTGCAGTGCTAGGAGACTTGTGGGTGGCCACAGTGCAGGTCAGG  
CACACCGGCCAGCACCACCCACAGCCCAAATTCCTAAAGAAATATTTGGGTCCCAG  
CTTGGCCCGAGTCTCTGTTGTCCTGGGAGGTTTCCCGGAACCTTTGGAAAACCG  
GAAGGACATCAAGATCTGAGTGTATGATGGCCTGGGGCCTTGCATGTGGTGGGGGT  
CCAAGCCTGCCTCTGCTCACTTGTTCTGCAGACTGGCATGTTCTCTGTGATACTTACA  
TACTTGTTTAAACTTTCAGGGAAGAAAAGTCAGAAGACCAGGACCTCCAGGGCCTC  
AAGGACAAACCCCTCAAGTTTAAAAAGGTGAAGAAAGATAAGAAAGAAGAGAAAG  
AGGGCAAGCATGAGCCCGTGCAGCCATCAGCCCACCACTCTGCTGAGCCCGCAGAG  
GCAGGCAAAGCAGAGACATCAGAAGGGTTCAGGCTCCGCCCCGGCTGTGCCGGAAGC  
TTCTGCCTCCCCAAACAGCGGCGCTCCATCATCCGTGACCGGGGACCCATGTATGA  
TGACCCACCCCTGCCTGAAGGCTGGACAACCGAAGCTTAAGCAAAGGAAATCTGGCC  
GCTCTGCTGGGAAGTATGATGTGTATTTGATCAAGTAAGTAAGAGCAACTCCTATCT  
CTACAGGGCAGGGAGGGCAGGGACAAGGATCCCTCATGGAGCAGGAAAATGTATGT  
GCCAGGGTGGGGTCGGGGGGAACATAAACAATGAACACTGAGACCAGGTGTGCTT  
GAAATGACCGTGTACAGAGGTGCTGCCCTGAGTGGGAAGTTCTCAAGGTAGCAGG  
CCCTCTATCCTCTCCACACCTCAAGTCTTTATCTGGGGATGGAATAGCTGCGGAAGC  
AGAGGAACTTGCAGAGCCAGGGGTTTCAGAGGGGTGAAGAAGCATGTTTCAGTTCTG  
CCTTTTAAATGATCCCAAAGGTTAGCAGTTTTCAAATGACATTTGCAGACAGCCT  
CATTTAATCCATGAGAAGGGTGAGCAAAGGATTATCTTGTGAAACTGATTCTCTGG  
AGAGACTGAGCACACTAGTGACTACAAAGACCATGACGG

**Sequence S9.** Consensus sequence of Edited Outcome B1 in R282X cells represented in Figure 6B.

GGGTTACCTGTTGTCAAGATAAGGAAACTGAAGCACAGAATGCTGAGGTCATTTGCT  
GGGTTTCATGTTTGGAAAGCGGCAAAGGATTTTCAGTGCAGGTTGGCTGGCTCCAAACC  
TGTGTGTGCTTTCCATGACACTGTACTGTGTGCCTCATTGAGCCTCATTCTAGAAAAC  
CAAAAACACACCCCAAGGCCCGGCTTCACAAAGGAGACCCCTTCCCCATTTGGCTC  
CCTTTCCAGCAGTCGACGGCCTCTTGTGAGCCATCGAGCCCAGAGTCCCTTGAAGTG  
CGACTCATGCTGGGGTGGTATGCTCAGGAGCCGCAGTGTTTCCGCTCAGAGGAAAG  
GGCTCTGATTCTCCTGCAGTGCTAGGAGACTTGTGGGTGGCCACAGTGCAGGTCAGG  
CACACCGGCCAGCACCACCCACAGCCCAAATTCCTAAAGAAATATTTGGGTCCCAG  
CTTGGCCCGAGTCTCTGTTGTCCTGGGAGGTTTCCCGGAACCTTTGGAAAACCG  
GAAGGACATCAAGATCTGAGTGTATGATGGCCTGGGGCCTTGCATGTGGTGGGGGT  
CCAAGCCTGCCTCTGCTCACTTGTTCTGCAGACTGGCATGTTCTCTGTGATACTTACA  
TACTTGTTTAAACTTTCAGGGAAGAAAAGTCAGAAGACCAGGACCTCCAGGGCCTC  
AAGGACAAACCCCTCAAGTTTAAAAAGGTGAAGAAAGATAAGAAAGAAGAGAAAG  
AGGGCAAGCATGAGCCCGTGCAGCCATCAGCCCACCACTCTGCTGAGCCCGCAGAG  
GCAGGCAAAGCAGAGACATCAGAAGGGTTCAGGCTCCGCCCCGGCTGTGCCGGAAGC  
TTCTGCCTCCCCAAACAGCGGCGCTCCATCATCCGTGACCGGGGACCCATGTATGA  
TGACCCACCCCTGCCTGAAGGCTGGACACCGAAGCTTAAGCAAAGGAAATCTGGCC  
GCTCTGCTGGGAAGTATGATGTGTATTTGATCAAGTAAGTAAGAGCAACTCCTATCT  
CTACAGGGCAGGGAGGGCAGGGACAAGGATCCCTCATGGAGCAGGAAAATGTATGT

GCCCAGGGTGGGGTCGGGGGGAACATAAACAATGAACACTGAGACCAGGTGTGCTT  
GAAATGACCGTGTACAGAGGTGCTGCCCTGAGTGGGAAGTTCTCAAGGTAGCAGG  
CCCTCTATCCTCTCCACACCTCAAGTCTTTATCTGGGGATGGAATAGCTGCGGAAGC  
AGAGGAACTTGCAGAGCCAGGGGTTTCAGAGGGGTGAAGAAGCATGTTTCAGTTCTG  
CCTTTTAAATGATCCCAAAAAGGTTAGCAGTTTTCAAATGACATTTGCAGACAGCCT  
CATTTAATTCCATGAGAAGGGTGAGCAAAGGATTATCTTGTTGAAACTGATTCCTGG  
AGAGACTGAGCACACTAGTGACTACAAAGACCATGACGG

**Sequence S10.** Consensus sequence of Edited Outcome B2 in R282X cells represented in Figure 6B.

GGGTTACCTGTTGTCAAGATAAGGAAACTGAAGCACAGAATGCTGAGGTCATTTGCT  
GGGTTTCATGTTTGGAAAGCGGCAAAGGATTTTCAGTGCAGGTTGGCTGGCTCCAAACC  
TGTGTGTGCTTTCCATGACACTGTACTGTGTGCCTCATTGAGCCTCATTCTAGAAAAC  
CAAAAACACACCCAAGGCCCGGCCTTCACAAAGGAGACCCCTCCCCATTTGGCTC  
CCTTTCCAGCAGTCGACGGCCTCTTGTCAGCCATCGAGCCCAGAGTCCCTTGAAGTG  
CGACTCATGCTGGGGTGGTATGCTCAGGAGCCGCAGTGTTCGCTCAGAGGAAAG  
GGCTCTGATTCTCCTGCAGTGCTAGGAGACTTGTGGGTGGCCACAGTGCAGGTCAGG  
CACACCGGCCAGCACCCACAGCCCAAATTCCTAAAGAAATATTTGGGTCCCAG  
CTTGGCCCGAGTCTCTGTTGCTCTGGGAGGTTCCCGGAACCTTTTGGAAAACCG  
GAAGGACATCAAGATCTGAGTGTATGATGGCCTGGGGCCTTGCATGTGGTGGGGGT  
CCAAGCCTGCCTCTGCTCACTTGTCTGCAGACTGGCATGTTCTCTGTGATACTTACA  
TACTTGTTTAACTTTCAGGGAAGAAAAGTCAGAAGACCAGGACCTCCAGGGCCTC  
AAGGACAAACCCCTCAAGTTTAAAAAGGTGAAGAAAGATAAGAAAGAAGAGAAAG  
AGGGCAAGCATGAGCCCGTGCAGCCATCAGCCCACCACTCTGCTGAGCCCGCAGAG  
GCAGGCAAAGCAGAGACATCAGAAGGGTTCAGGCTCCGCCCCGGCTGTGCCGGAAGC  
TTCTGCCTCCCCCAACAGCGGCGCTCCATCATCCGTGACCGGGGACCCATGTATGA  
TGACCCACCCCTGCCTGAAGGCTGGACACGGAAGCTTAAGCAAAGGAAATCTGGCC  
GCTCTGCTGGGAAGTATGATGTGATTTGATCAAGTAAGTAAGAGCAACTCCTATCT  
CTACAGGGCAGGGAGGGCAGGGACAAGGATCCCTCATGGAGCAGGAAAATGTATGT  
GCCAGGGTGGGGTCGGGGGGAACATAAACAATGAACACTGAGACCAGGTGTGCTT  
GAAATGACCGTGTACAGAGGTGCTGCCCTGAGTGGGAAGTTCTCAAGGTAGCAGG  
CCCTCTATCCTCTCCACACCTCAAGTCTTTATCTGGGGATGGAATAGCTGCGGAAGC  
AGAGGAACTTGCAGAGCCAGGGGTTTCAGAGGGGTGAAGAAGCATGTTTCAGTTCTG  
CCTTTTAAATGATCCCAAAAAGGTTAGCAGTTTTCAAATGACATTTGCAGACAGCCT  
CATTTAATTCCATGAGAAGGGTGAGCAAAGGATTATCTTGTTGAAACTGATTCCTGG  
AGAGACTGAGCACACTAGTGACTACAAAGACCATGACGG

**Sequence S11.** Consensus sequence of Edited Outcome B3 in R282X cells represented in Figure 6B.

GGGTTACCTGTTGTCAAGATAAGGAAACTGAAGCACAGAATGCTGAGGTCATTTGCT  
GGGTTTCATGTTTGGAAAGCGGCAAAGGATTTTCAGTGCAGGTTGGCTGGCTCCAAACC  
TGTGTGTGCTTTCCATGACACTGTACTGTGTGCCTCATTGAGCCTCATTCTAGAAAAC  
CAAAAACACACCCAAGGCCCGGCCTTCACAAAGGAGACCCCTCCCCATTTGGCTC

CCTTTCCAGCAGTCGACGGCCTCTTGTGTCAGCCATCGAGCCCAGAGTCCCTTGAAGTG  
CGACTCATGCTGGGGTGGTATGCTCAGGAGCCGCAGTGTTTCCGCTCAGAGGAAAG  
GGCTCTGATTCTCCTGCAGTGCTAGGAGACTTGTGGGTGGCCACAGTGCAGGTCAGG  
CACACCGGCCAGCACCACCCACAGCCCAAATTCCTAAAGAAATATTTGGGTCCCAG  
CTTGGCCCGAGTCTCTGTTGTCTGGGGAAGGACATCAAGATCTGAGTGTATGATGG  
CCTGGGGCCTTGCATGTGGTGGGGGTCCAAGCCTGCCTCTGCTCACTTGTCTGCAG  
ACTGGCATGTTCTCTGTGATACTTACATACTTGTTTAAACTTCAGGGAAGAAAAGT  
CAGAAGACCAGGACCTCCAGGGCCTCAAGGACAAACCCCTCAAGTTTAAAAAGGTG  
AAGAAAGATAAGAAAGAAGAGAAAGAGGGCAAGCATGAGCCCGTGCAGCCATCAG  
CCCACCACTCTGCTGAGCCCGCAGAGGCAGGCAAAGCAGAGACATCAGAAGGGTCA  
GGCTCCGCCCCGGCTGTGCCGGAAGCTTCTGCCTCCCCAAACAGCGGCGCTCCATC  
ATCCGTGACCGGGGACCCATGTATGATGACCCACCCCTGCCTGAAGGCTGGACACG  
GAAGCTTAAGCAAAGGAAATCTGGCCGCTCTGCTGGGAAGTATGATGTGTATTTGAT  
CAAGTAAGTAAGAGCAACTCCTATCTCTACAGGGCAGGGAGGGCAGGGACAAGGAT  
CCCTCATGGAGCAGGAAAATGTATGTGCCAGGGTGGGGTTCGGGGGAACATAAAC  
AATGAACACTGAGACCAGGTGTGCTTGAATGACCGTGTACAGAGGTGCTGCCCT  
GAGTGGGAAGTTCTCAAGGTAGCAGGCCCTCTATCCTCTCCACACCTCAAGTCTTTA  
TCTGGGGATGGAATAGCTGCGGAAGCAGAGGAACTTGCAGAGCAGGGGTTTCAGAG  
GGGTGAAGAAGCATGTTTCAGTTCTGCCTTTTAAATGATCCCAAAAAGGTTAGCAGT  
TTTCAAATGACATTTGCAGACAGCCTCATTTAATTCCATGAGAAGGGTGAAGCAAAGG  
ATTATCTTGTGAAACTGATTCCTGGAGAGACTGAGCACACTAGTGACTACAAAGA  
CCATGACGG

**Sequence S12.** Consensus sequence of Edited Outcome B4 in R282X cells represented in Figure 6B.

GGGTTACCTGTTGTCAAGATAAGGAAACTGAAGCACAGAATGCTGAGGTCATTTGCT  
GGGTTTCATGTTTGGAAAGCGGCAAAGGATTTTCAGTGCAGGTTGGCTGGCTCCAAACC  
TGTGTGTGCTTTCCATGACACTGTACTGTGTGCCTCATTGAGCCTCATTCTAGAAAAC  
CAAAAACACACCCAAGGCCCGCCTTCACAAAGGAGACCCCTCCCCATTTGGCTC  
CCTTTCCAGCAGTCGACGGCCTCTTGTGTCAGCCATCGAGCCCAGAGTCCCTTGAAGTG  
CGACTCATGCTGGGGTGGTATGCTCAGGAGCCGCAGTGTTTCCGCTCAGAGGAAAG  
GGCTCTGATTCTCCTGCAGTGCTAGGAGACTTGTGGGTGGCCACAGTGCAGGTCAGG  
CACACCGGCCAGCACCACCCACAGCCCAAATTCCTAAAGAAATATTTGGGTCCCAG  
CTTGGCCCGAGTCTCTGTTGTCTGGGGAAGGACATCAAGATCTGAGTGTATGATGG  
CCTGGGGCCTTGCATGTGGTGGGGGTCCAAGCCTGCCTCTGCTCACTTGTCTGCAG  
ACTGGCATGTTCTCTGTGATACTTACATACTTGTTTAAACTTCAGGGAAGAAAAGT  
CAGAAGACCAGGACCTCCAGGGCCTCAAGGACAAACCCCTCAAGTTTAAAAAGGTG  
AAGAAAGATAAGAAAGAAGAGAAAGAGGGCAAGCATGAGCCCGTGCAGCCATCAG  
CCCACCACTCTGCTGAGCCCGCAGAGGCAGGCAAAGCAGAGACATCAGAAGGGTCA  
GGCTCCGCCCCGGCTGTGCCGGAAGCTTCTGCCTCCCCAAACAGCGGCGCTCCATC  
ATCCGTGACCGGGGACCCATGTATGATGACCCACCCCTGCCTGAAGGCTGGACACG  
GAAGCTTAAGCAAAGGAAATCTGGCCGCTCTGCTGGGAAGTATGATGTGTATTTGAT  
CAAGTAAGTAAGAGCAACTCCTATCTCTACAGGGCAGGGAGGGCAGGGACAAGGAT

CCCTCATGGAGCAGGAAAATGTATGTGCCAGGGTGGGGTTCGGGGGGAACATAAAC  
AATGAACACTGAGACCAGGTGTGCTTCAAATGACCGTGTACAGAGGTTCGCTGCCCT  
GAGTGGGAAGTTCTCAAGGTAGCAGGCCCTCTATCCTCTCCACACCTCAAGTCTTTA  
TCTGGGGATGGAATAGCTGCGGAAGCAGAGGAACTTGCAGAGCTAGGGGTTTCAGAG  
GGGTGAAGAAGCATGTTTCAGTTCTGCCTTTTAAATGATCCCAAAAAGGTTAGCAGT  
TTCAAATGACATTTGCAGACAGCCTCATTTAATTCCATGAGAAGGGTGCAGCAAAGG  
ATTATCTTGTTGAAACTGATTCCTGGAGAGACTGAGCACACTAGTGACTACAAAGA  
CCATGACGG

**Sequence S13.** Consensus sequence of Edited Outcome C1 in R282X cells represented in Figure 6C.

CTAGTGACTACAAAGACCATGACGGTATCGATCGTACCTGAGTTCAAACCTGGGA  
ATGTTCTAGATGGTGACTCAGGCCAGGCACCAACCAGCAGAATGGGCCTCAGCCT  
GACAACCCTTCTGTACCAGGCCTGACTCTTTGGTTGCTGAACTTTGGAGAGGCCTGG  
GGGGTTCAGCGGCAGGCAGACGAGTGAGTGGCTTTGGTGACAGGTCCTCAGGGGCA  
GCCAGGCAGTGTGACTCTCGTTCAATAGTAACGTTTGTTCAGAGCGTTGTCACCACCA  
TCCGCTCTGCCCTATCTCTGACATTGCTATGGAGAGCCTCTAATTGTTCTTGTGTCT  
TTCTGTTTGTCCCCACAGTCCCCAGGGAAAAGCCTTTCGCTCTAAAGTGGAGTTGAT  
TGCGTACTTCGAAAAGGTAGGCGACACATCCCTGGACCCTAATGATTTTGACTTCAC  
GGTAACTGGGAGAGGGAGCCCCCTCCCGGCGAGAGCAGAAACCACCTAAGAAGCCC  
AAATCTCCCAAAGCTCCAGGAACTGGCAGAGGCCGGGGACGCCCAAAGGGAGCG  
GCACCACGAGACCCAAGGCGGCCACGTCAGAGGGTGTGCAGGTGAAAAGGGTCCTG  
GAGAAAAGTCCTGGGAAGCTCCTTGTCAAGATGCCTTTTCAAACCTTCGCCAGGGGGC  
AAGGCTGAGGGGGGTGGGGCCACCACATCCACCCAGGTCATGGTGTGATCAAACGCC  
CGGCAGGAAGCGAAAAGCTGAGGCCGACCCTCAGGCCATTCCCAAGAAACGGGGC  
CGAAAGCCGGGGAGTGTGGTGGCAGCCGCTGCCGCCGAGGCCAAAAGAAAGCCG  
TGAAGGAGTCTTCTATCCGATCTGTGCAGGAGACCGTACTCCCCATCAAGAAGCGCA  
AGACCCGGGAGACGGTCAGCATCGAGGTCAAGGAAGTGGTGAAGCCCCCTGCTGGTG  
TCCACCCTCGGTGAGAAGAGCGGGAAAGGACTGAAGACCTGTAAGAGCCCTGGGCG  
GAAAAGCAAGGAGAGCAGCCCCAAGGGGCGCAGCAGCAGCGCCTCCTCACCCCC  
AAGAAGGAGCACCACCACCATCACCACCACTCAGAGTCCCCAAAGGCCCCCGTGCC  
ACTGCTCCCACCCCTGCCCCACCTCCACCTGAGCCCAGAGCTCCGAGGACCCAC  
CAGCCCCCTGAGCCCCAGGACTTGAGCAGCAGTGTCTGCAAAGAGGAGAAGATGC  
CCAGAGGAGGCTCACTGGAGAGCGACGGCTGCCCAAGGAGCCAGCTAAGACTCAG  
CCCGCGGTTGCCACCGCCGCCACGGCCGCAGAAAAGTACAAACACCGAGGGGAGG  
GAGAGCGCAAAGACATTGTTTCATCCTCCATGCCAAGGCCAAACAGAGAGGAGCCT  
GTGGACAGCCGGACGCCCGTGACCGAGAGAGTTAGCTGACTTTACACGGAGCGGAT  
TGCAAAGCAAACCAACAAGAATAAAGGCAGCTGTTGTCTCTTCTCCTTATGGGTAGG  
GCTCTGACAAAGCTTCCCGATTAAGTAAATAAAAAATATTTTTTTTTCTTTCAGTAA  
ACTTAGAGTTTCGTGGCTTCAGGGTGGGAGTAGTTGGAGCATTGGGGATGTTTTTCT  
TACCGACAAGCACAGTCAGGTTGAAGACCTAACAGGGCCAGAAGTAGCTTTGCAC  
TTTTCTAAACTAGGCTCCTTCAACAAGGCTTGCTGCAGATACTACTGACCAGACAAG  
CTGTTGACCAGGCACCTCCCCTCCCGCCCAAACCTTCCCCCATGTGGTCGTTAGAG

ACAGAGCGACAGAGCAGTTGAGAGGACACTCCCGTTTTTCGGTGCCATCAGTGCCCC  
GTCTACAGCTCCCCCAGCTCCCCCACCTCCCCACTCCCAACCACGTTGGGACAGG  
GAGGTGTGAGGCAGGAGAGACAGTTGGATTCTTTAGAGAAGATGGATATGACCAGT  
GGCTATGGCCTGTGCGATCCCACCCGTGGTGGCTCAAGTCTGGCCCCACACCAGCCC  
CAATCCAAAACCTGGCAAGGACGCTTCACAGGACAGGAAAGTGGCACCTGTCTGCTC  
CAGCTCTGGCATGGCTAGGAGGGGGGAGTCCCTTGAACACTGGGTGTAGACTGGC  
CTGAACCACAGGAGAGGATGGCCCAGGGTGGAGGTGGCATGGTCCATTCTCAAGGGA  
CGTCTCCAACGGGTGGCGCTAGAGGCCATGGAGGCAGTAGGACAAGGTGCAGGCA  
GGCTGGCCTGGGGTCAGGCCGGGCAGAGCACAGCGGGGTGAGAGGGATTCTTAATC  
ACTCAGAGCAGTCTGTGACTTAGTGGACAGGGGAGGGGGCAAAGGGGGAGGAGAA  
GAAAATGTTCTTCCAGTTACTTTCCAATTCTCCTTTAGGGACAGCTTAGAATTATTG  
CACTATTGAGTCTTCATGTTCCCACTTCAAACAAACAGATGCTCTGAGAGCAAAC  
GGCTTGAATTGGTGACATTTAGTCCCTCAAGCCACCAGATGTGACAGTGTTGAGAAC  
TACCTGGATTTGTATATATACCTGCGCTTGTTTTAAAGTGGGCTCAGCACATAGGGTT  
CCCACGAAGCTCCGAAACTCTAAGTGTTTGTGCAATTTTATAAGGACTTCCTGATT  
GTTTCTCTTCTCCCTTCCATTTCTGCCTTTTGTTCAATTCATCCTTTCACTTCT

**Sequence S14.** Consensus sequence of Edited Outcome C2 in R282X cells represented in Figure 6C.

CTAGTGACTACAAAGACCATGACGGTATCGATCGTACCTGAGTTCAAACCTTGGGA  
ATGTTCTAGATGGTGACTCAGGCCAGGCACCAACCAGCAGAATGGGCCTCAGCCT  
GACAACCCTTCTGTACCAGGCCTGACTCTTTGGTTGCTGAACTTTGGAGAGGCCTGG  
GGGGTTCAGCGGCAGGCAGACGAGTGAGTGGCTTTGGTGACAGGTCCTCAGGGGCA  
GCCAGGCAGTGTGACTCTCGTTCAATAGTAACGTTTGTGTCAGAGCGTTGTCACCACCA  
TCCGCTCTGCCCTATCTCTGACATTGCTATGGAGAGCCTCTAATTGTTCTTGTGTCT  
TTCTGTTTGTCCCCACAGTCCCCAGGGAAAAGCCTTTCGCTCTAAAGTGGAGTTGAT  
TGCGTACTTCGAAAAGGTAGGCGACACATCCCTGGACCCTAATGATTTTGACTTCAC  
GGTAACTGGGAGAGGGAGCCCCCTCCCGGCGAGAGCAGAAACCACCTAAGAAGCCC  
AAATCTCCCAAAGCTCCAGGAACTGGCAGAGGCCGGGGACGCCCAAAGGGAGCG  
GCACCACGAGACCCAAGGCGGCCACGTCAGAGGGTGTGCAGGTGAAAAGGGTCCTG  
GAGAAAAGTCCTGGGAAGCTCCTTGTCAAGATGCCTTTTCAAACCTTCGCCAGGGGGC  
AAGGCTGAGGGGGGTGGGGCCACCACATCCACCCAGGTCATGGTGATCAAACGCC  
CGGCAGGAAGCGAAAAGCTGAGGCCGACCCTCAGGCCATTCCAAGAAACGGGGC  
TGAAGCCGGGGAGTGTGGTGGCAGCCGCTGCCGCCGAGGCCAAAAGAAAGCCG  
TGAAGGAGTCTTCTATCCGATCTGTGCAGGAGACCGTACTCCCCATCAAGAAGCGCA  
AGACCCGGGAGACGGTCAGCATCGAGGTCAAGGAAGTGGTGAAGCCCCTGCTGGTG  
TCCACCCTCGGTGAGAAGAGCGGGAAAGGACTGAAGACCTGTAAGAGCCCTGGGCG  
GAAAAGCAAGGAGAGCAGCCCCAAGGGGCGCAGCAGCAGCGCCTCCTCACCCCC  
AAGAAGGAGCACCACCACCATCACCACCACTCAGAGTCCCCAAAGGCCCCCGTGCC  
ACTGCTCCCACCCCTGCCCCACCTCCACCTGAGCCCAGAGGCTCCGAGGACCCAC  
CAGCCCCCTGAGCCCCAGGACTTGAGCAGCAGTGTCTGCAAAGAGGAGAAGATGC  
CCAGAGGAGGCTCACTGGAGAGCGACGGCTGCCCAAAGGAGCCAGCTAAGACTCAG  
CCCGCGGTTGCCACCGCCGCCACGGCCGCAGAAAAGTACAAACACCGAGGGGAGG

GAGAGCGCAAAGACATTGTTTCATCCTCCATGCCAAGGCCAAACAGAGAGGAGCCT  
GTGGACAGCCGGACGCCCGTGACCGAGAGAGTTAGCTGACTTTACACGGAGCGGAT  
TGCAAAGCAAACCAACAAGAATAAAGGCAGCTGTTGTCTCTTCTCCTTATGGGTAGG  
GCTCTGACAAAGCTTCCCGATTAAGTAAATAAAAAATATTTTTTTTTCTTTCAGTAA  
ACTTAGAGTTTCGTGGCTTCAGGGTGGGAGTAGTTGGAGCATTGGGGATGTTTTTCT  
TACCGACAAGCACAGTCAGGTTGAAGACCTAACCAGGGCCAGAAGTAGCTTTGCAC  
TTTTCTAAACTAGGCTCCTTCAACAAGGCTTGCTGCAGATACTACTGACCAGACAAG  
CTGTTGACCAGGCACCTCCCCTCCCGCCCAACCTTTCCCCCATGTGGTCGTTAGAG  
ACAGAGCGACAGAGCAGTTGAGAGGACACTCCCGTTTTTCGGTGCCATCAGTGCCCC  
GTCTACAGCTCCCCCAGCTCCCCCACCTCCCCACTCCAACCACGTTGGGACAGG  
GAGGTGTGAGGCAGGAGAGACAGTTGGATTCTTTAGAGAAGATGGATATGACCAGT  
GGCTATGGCCTGTGCGATCCCACCCGTGGTGGCTCAAGTCTGGCCCCACACCAGCCC  
CAATCCAAAACCTGGCAAGGACGCTTCACAGGACAGGAAAGTGGCACCTGTCTGCTC  
CAGCTCTGGCATGGCTAGGAGGGGGGAGTCCCTTGAACACTGGGTGTAGACTGGC  
CTGAACCACAGGAGAGGATGGCCCAGGGTGGAGGTGGCATGGTCCATTCTCAAGGGA  
CGTCTCCAACGGGTGGCGCTAGAGGCCATGGAGGCAGTAGGACAAGGTGCAGGCA  
GGCTGGCCTGGGGTCAGGCCGGGCAGAGCACAGCGGGGTGAGAGGGATTCCCTAATC  
ACTCAGAGCAGTCTGTGACTTAGTGGACAGGGGAGGGGGCAAAGGGGGAGGAGAA  
GAAAATGTTCTTCCAGTTACTTTCCAATTCTCCTTTAGGGACAGCTTAGAATTATTG  
CACTATTGAGTCTTCATGTTCCCACTTCAAAAACAAACAGATGCTCTGAGAGCAAAC  
GGCTTGAATTGGTGACATTTAGTCCCTCAAGCCACCAGATGTGACAGTGTTGAGAAC  
TACCTGGATTTGTATATATACCTGCGCTTGTTTTAAAGTGGGCTCAGCACATAGGGTT  
CCCACGAAGCTCCGAAACTCTAAGTGTTTGCTGCAATTTTATAAGGACTTCCTGATT  
GTTTTCTCTTCTCCCCTTCCATTTCTGCCTTTTGTTCAATTCATCCTTTCACTTCT

## Supplementary Figure Legends

**Figure S1. 5' Sequence analysis of edited MECP2 gene in S134C cells.** **A.** Specific PCR product (1.4 kb) obtained with the edited hemizygous male S134C Rett syndrome cells with 5' TI assay (M: Marker; UT: Untransduced S134C cells; T: Transduced S134C cells). **B.** Sanger Sequence analysis of the edited MECP2 gene in hemizygous male S134C Rett syndrome cells. Shown are the chromatograms of 5' genome-vector junction, SNP in Intron 2, Linker 1 sequence and Linker 2 sequence, representing the 2 editing outcomes (B1 and B2) observed in S134C cells with the 5' TI assay. The primers used for 5' TI analyses are depicted as thick red arrows.

**Figure S2. 3' Sequence analysis of edited MECP2 gene in S134C cells.** **A.** Specific PCR product (2.7 kb) obtained with the edited hemizygous male S134C Rett syndrome cells with 3' TI assay (M: Marker; UT: Untransduced S134C cells; T: Transduced S134C cells). **B.** Sequence analysis of the edited MECP2 gene in hemizygous male S134C Rett syndrome cells. Shown are the chromatograms of Linker 2 sequence, codon encoding WT S or mutant C at position 134, Exon 4-3' UTR junction sequence and 3' vector-genome junction sequence, representing the 2 editing outcomes (C1 and C2) observed in S134C cells with the 3' TI assay. The primers used for 3' TI analyses are depicted as thick red arrows.

**Figure S3. 5' Sequence analysis of edited MECP2 gene in R106W cells** **A.** Specific PCR product (1.5 kb) obtained with the edited heterozygous female R106W Rett syndrome cells with 5' TI assay (M: Marker; UT: Untransduced R106W cells; T: Transduced R106W cells). **B.** Sequence analysis of the edited MECP2 gene in R106W Rett syndrome cells. Shown are the chromatograms of 5' genome-vector junction, SNP in Intron 2, Linker 1 sequence, codon encoding WT R or mutant W at position 106, SNP in Intron 3 and Linker 2 sequence, representing the 4 editing outcomes (1, 2, 3 and 4) observed in R106W cells with the 5' TI assay. The primers used for 5' TI analyses are depicted as thick red arrows.

**Figure S4. 5' Sequence analysis of edited MECP2 gene in R282X cells.** **A.** Specific PCR product (1.4 kb) obtained with the edited heterozygous female R282X Rett syndrome cells with 5' TI assay (M: Marker; UT: Untransduced R282X cells; T: Transduced R282X cells). **B.** Sequence analysis of the edited MECP2 gene in R282X Rett syndrome cells. Shown are the chromatograms of 5' genome-vector junction, SNP in Intron 2, Linker 1 sequence, SNP in Intron 3 and Linker 2 sequence, representing the 4 editing outcomes (B1, B2, B3 and B4) observed in R282X cells with the 5' TI assay. The primers used for 5' TI analyses are depicted as thick red arrows.

**Figure S5. 3' Sequence analysis of edited MECP2 gene in R282X cells.** **A.** Specific PCR product (2.7 kb) obtained with the edited heterozygous female R282X Rett syndrome cells with 3' TI assay (M: Marker; UT: Untransduced R282X cells; T: Transduced R282X cells). **B.** Sequence analysis of the edited MECP2 gene in R282X Rett syndrome cells. Shown are the chromatograms of Linker 2 sequence, codon encoding WT R or mutant X at position 282, SNP encoding for S at position 423, Exon 4-3' UTR junction sequence and 3' vector-genome junction sequence, representing the 2 editing outcomes (C1 and C2) observed in R282X cells with the 3' TI assay. The primers used for 3' TI analyses are depicted as thick red arrows.

**Figure S6. Restoration of MeCP2 expression in edited male hemizygous GM21921 (r.378\_384del) fibroblasts.** Mean MeCP2 fluorescence intensity (MFI) in untransduced (Untd) GM21921 cells and AAVHSC7-226 edited GM21921 cells. Data shows the average of MFI from 2 separate experiments. Bars represent the standard deviation.
